# Supplementary material for: Facile synthesis of organosilica-capped mesoporous silica nanocarriers with selective redox-triggered drug release properties for safe tumor chemotherapy
Source: Royal Society of Chemistry journal article supplement (doi:10.1039/c8bm01669k), 2019-01-01
Supplement: c8bm01669k1.pdf [file c8bm01669k1.pdf]

## Supporting Information

### **Facile Synthesis of Organosilica-capped Mesoporous Silica Nanocarriers with Selective Redox-triggered Drug Release Property for Safe Tumor Chemotherapy**

Luying Shen,<sup>a, #</sup> Shan Pan,<sup>a, #</sup> Dechao Niu,<sup>\*, a</sup> Jianping He,<sup>a</sup> Xiaobo Jia,<sup>a</sup>  
Jina Hao,<sup>a</sup> Jinlou Gu,<sup>a</sup> Wenru Zhao,<sup>a</sup> Pei Li,<sup>b</sup> Yongsheng Li,<sup>\*, a</sup>

<sup>a</sup> Lab of Low-Dimensional Materials Chemistry, Key Laboratory for Ultrafine  
Materials of Ministry of Education, School of Materials Science and Engineering,  
East China University of Science and Technology, Shanghai 200237, China.

<sup>b</sup> Department of Applied Biology and Chemical Technology, The Hong Kong  
Polytechnic University, Hong Kong, China

E-mail: [dcniu@ecust.edu.cn](mailto:dcniu@ecust.edu.cn), [ysli@ecust.edu.cn](mailto:ysli@ecust.edu.cn)

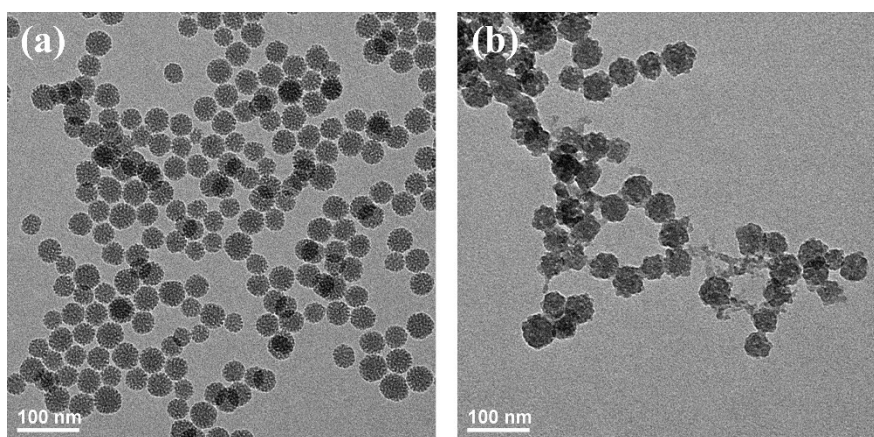

**Fig. S1.** TEM images of MSNs (a) and OMSNs (b).

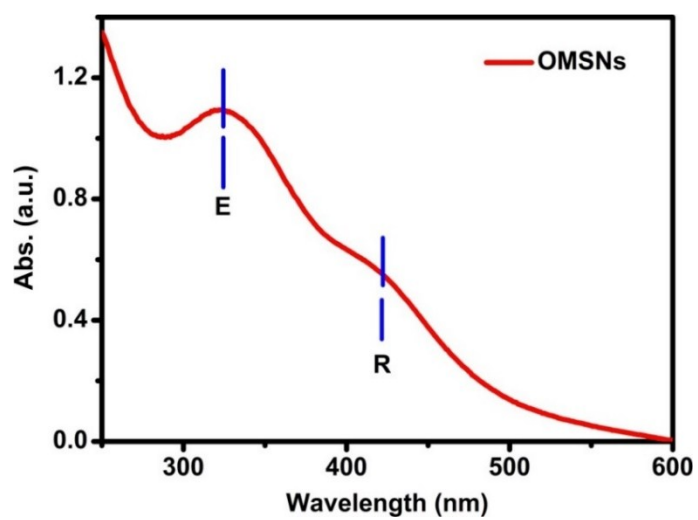

**Fig. S2.** The Ellman assay of OMSNs: E is the absorption peak of DTNB, R is the absorption peak of TNB.

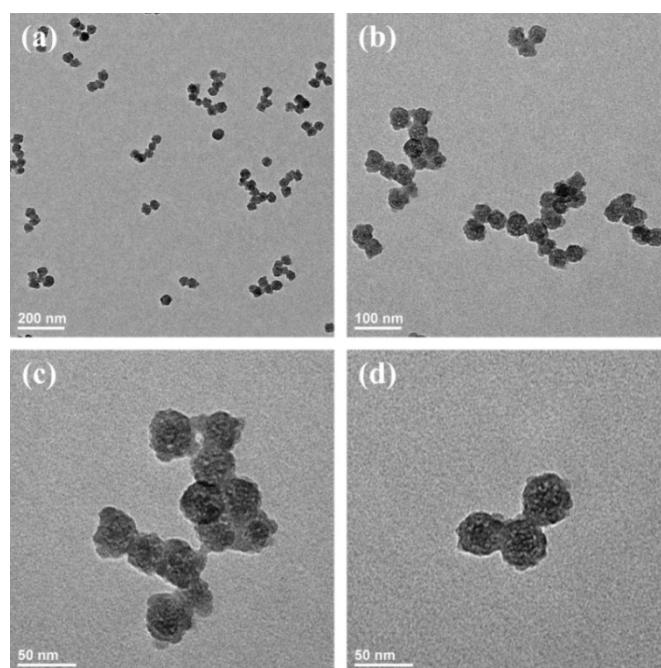

**Fig. S3.** TEM images of POMSNs at varied magnifications (a-d).

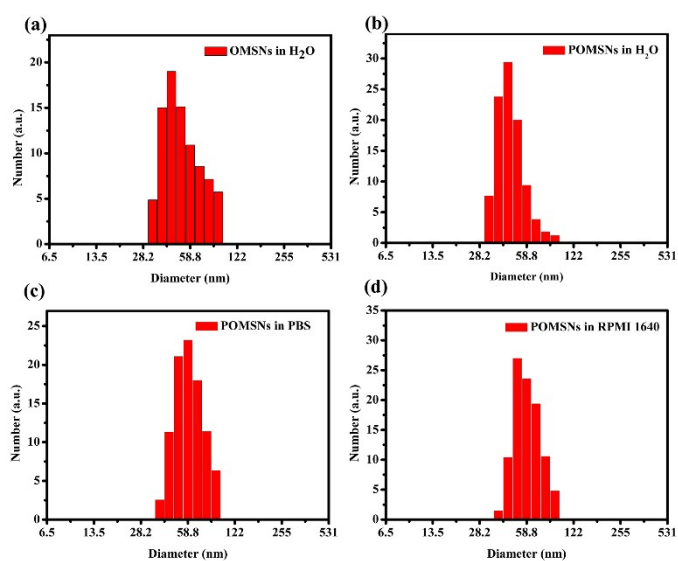

**Fig. S4.** Average hydrodynamic diameters of OMSNs in pure water (a) and of POMSNs in H<sub>2</sub>O (b), PBS (c) and RPMI 1640 (d).

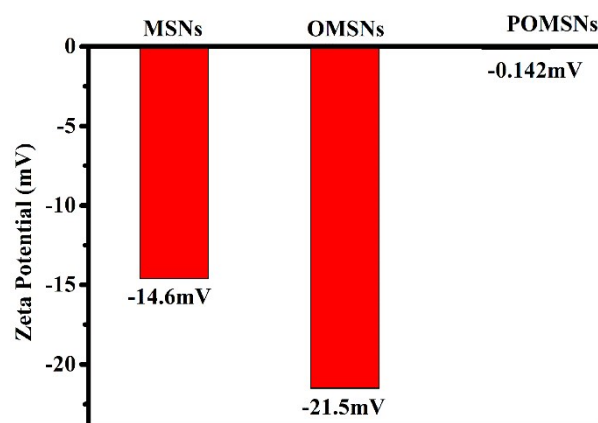

**Fig. S5.** Zeta potentials of MSNs, OMSNs and POMSNs in water.

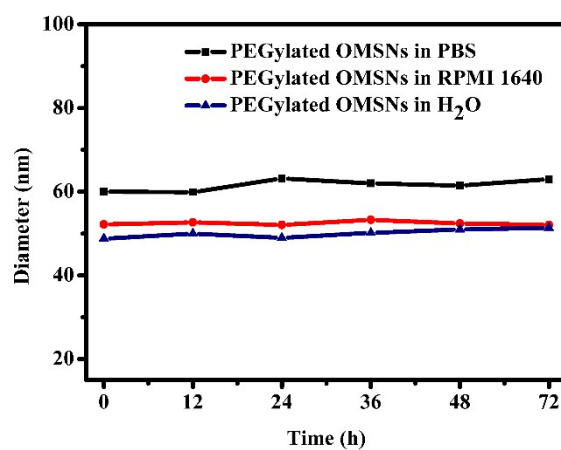

**Fig. S6.** The hydrodynamic particle sizes of POMSNs in pure water, PBS and RPMI 1640, respectively.

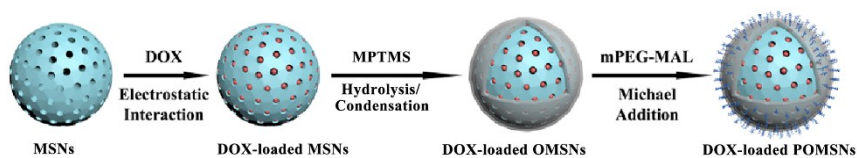

**Fig. S7.** Schematic illustration for the synthesis of the DOX-loaded POMSNs.

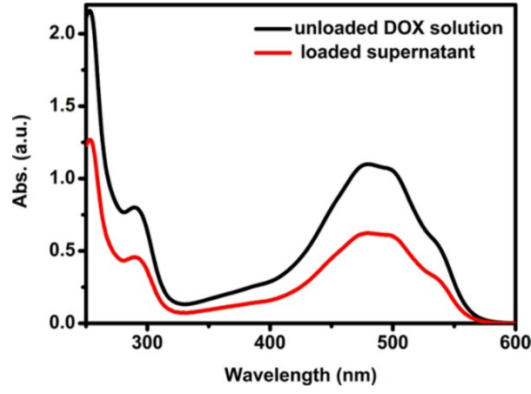

**Fig. S8.** UV-vis spectra of DOX-loaded MSNs.

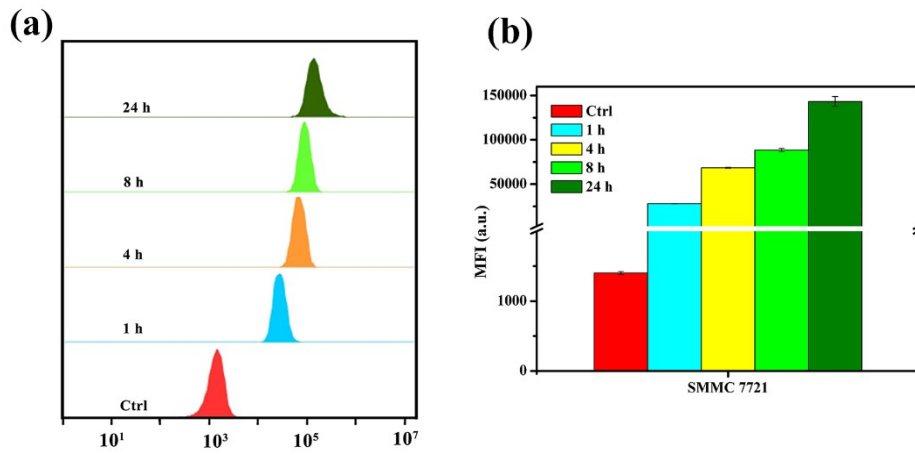

**Fig. S9.** (a) Flow Cytometric analysis and (b) Mean Fluorescence Intensity analysis of FL2-A channel in SMMC-7721 cells after incubated with DOX-loaded POMSs for different time points (1, 4, 8 and 24 h).

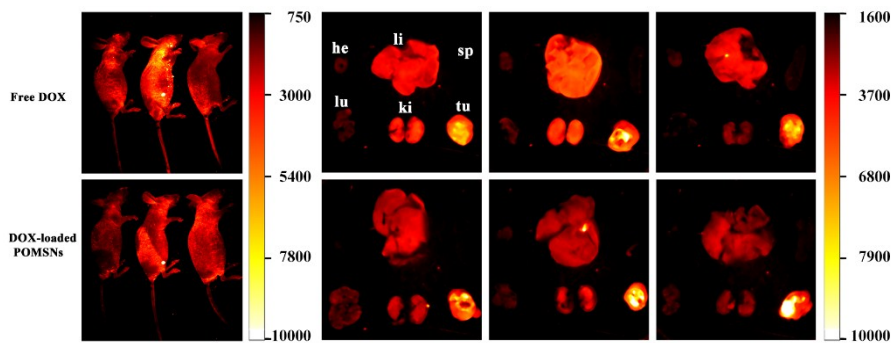

**Fig. S10.** Fluorescence images of DOX in mice after intravenous injection of Free DOX and DOX-loaded POMSs nanoparticles at a dosage of 5 mg/kg at different time points (1 h, 4 h and 24 h).
